# Supplementary material for: The Use of Phylogeny to Interpret Cross-Cultural Patterns in Plant Use and Guide Medicinal Plant Discovery: An Example from Pterocarpus (Leguminosae)
Source: PLoS One. 2011 Jul 18;6(7):e22275. doi: 10.1371/journal.pone.0022275 (PMC3138776; doi:10.1371/journal.pone.0022275)
Supplement: Table S2 — Voucher specimen information of Pterocarpus samples and GenBank accession numbers. (XLS) [file pone.0022275.s002.xls]

## Sheet: Sheet 1
Taxon	Collector	Collection locality	Collection date	ITS2	matK	ndhF-rpL32	trnL-F	rbcL
Pterocarpus acapulcensis Rose	Hughes, C.E. 769 (K),	Venezuela, Trujillo	07.03.1986	JN083464	JN083532	JN083584	JN083638	JN083708
Pterocarpus acapulcensis Rose (=Pterocarpus podocarpus S.F.Blake)	Wurdack, J.J. et al. 41202 (K)	Venezuela, Bolivar	12.02.1956	JN083465	JN083533	JN083585	JN083639	JN083709
Pterocarpus amazonum (Mart. ex Benth.) Amshoff	Schunke, J. 6192 (K)	Peru, Huanuco	-	JN083466	JN083534	JN083586	JN083640	JN083710
Pterocarpus amazonum (Mart. ex Benth.) Amshoff	Klitgaard, B. B. et al. 637 (BM)	Ecuador, Napo	-	JN083467	JN083535	JN083587	JN083641	JN083711
Pterocarpus amphymenium DC.	Medrano, F.G. 11805 (K)	Mexico, Oaxaca	02.03.1981	JN083468	JN083536	JN083588	JN083642	JN083712
Pterocarpus amphymenium DC.	Sousa, M. et al. 11937 (K)	Mexico, Oaxaca	17.03.1981	JN083469	JN083537	JN083589	JN083643	JN083713
Pterocarpus amphymenium DC. (=Pterocarpus aphyllus Micheli)	Morton, C.V. & Makrinius, E. 2399 (K)	Mexico, Oaxaca	15.04.1933	JN083470	JN083538	JN083590	JN083644	JN083714
Pterocarpus amphymenium DC. (=Pterocarpus orbiculatus DC.)	Hughes, C.E. 1167 (K)	Mexico, Guerrero	17.04.1988	JN083471	JN083539	JN083591	JN083645	JN083715
Pterocarpus angolensis DC.	Lisowki, S. 20268 (K)	Dem. Rep. Congo (Congo/Kinshasa), Haut-Katanga, Preto, Kashengeneke	11.11.1970	JN083472	-	JN083592	-	JN083716
Pterocarpus angolensis DC.	R.J. Rodin 8929 (K)	Namibia, Oshikango	14.02.1973	JN083473	-	JN083593	JN083646	JN083717
Pterocarpus brenanii L.Barb. & Torre	Macedo, J.M. de Aguilar 4693 (K)	Mozambique, Distr. Tete, Estima-Inhacapirire	25.01.1972	JN083474	-	-	-	-
Pterocarpus brenanii L.Barb. & Torre	Cannell, I. 16 (K)	Zimbabwe (Rhodesia), Distr. Kariba, (Sanyati river)	14.11.1966	JN083475	JN083540	JN083594	JN083647	JN083718
Pterocarpus cf. erinaceus Poir.	Chapman, J.D. 5213 (K)	Nigeria, Gongola State, Sarduana L.G. area, Mambilla Plataeu, Akwaijantar forest	06.02.1978	JN083476	JN083541	JN083595	JN083648	JN083719
Pterocarpus dalbergioides Roxb.	Puy, D. du M213 (K)	Madagascar, Toamasina (Tamatave Prov.), NE of Maroansetta	26.04.1989	JN083477	-	JN083596	JN083649	JN083720
Pterocarpus erinaceus Poir.	Pilz, G.E. 2290 (K)	Nigeria, Ogun	03.06.1979	JN083478	JN083542	JN083597	JN083650	JN083721
Pterocarpus erinaceus Poir.	Velakamp, J.F. 6117 (K)	Ghana, Amezofe	03.01.1974	JN083479	JN083543	JN083598	JN083651	JN083722
Pterocarpus indicus Willd.	Stancik & Nathaniel 5198 (K)	Papua New Guinea, Madang, Baitabag	17.09.2003	JN083480	JN083544	-	JN083652	JN083723
Pterocarpus indicus Willd.	Ambri & Arifin AA401 (K)	Indonesia,Wanariset, Kalimantan Timur	04.02.1992	JN083481	JN083545	JN083599	-	JN083724
Pterocarpus indicus Willd.	L. Lugas 2773 (K)	Malaysia , Borneo, Kota Belud district	13.07.1998	JN083482	JN083546	JN083600	JN083653	JN083725
Pterocarpus lucens Lepr. ex Guill. & Perr. subsp. antunesii (Taub.) Rojo	Pereira, A. & Correia, M.F. 2121 (K)	Mozambique (Mocambique), Cabora Bassa	18.04.1972	JN083483	JN083547	JN083601	JN083654	JN083726
Pterocarpus lucens Lepr. ex Guill. & Perr. subsp. lucens	Sebsebe, D. 1925 (K)	Ethiopia, Gojam Adm. Region, Metekel Awraja	20.08.1986	JN083484	JN083548	JN083602	JN083655	JN083727
Pterocarpus lucens Lepr. ex Guill. & Perr. subsp. lucens (=Pterocarpus abyssinicus Hochst. ex A.Rich.)	Breteler, F.J. 1155 (K)	Cameroon, Savannah, Money,Betare Oya	28.02.1961	JN083485	JN083549	JN083603	JN083656	JN083728
Pterocarpus lucens Lepr. ex Guill. & Perr. subsp. lucens (=Pterocarpus simplicifolius Baker)	Diallo, D. et al. 295 (K)	Mali, (French Sudan), Azzanturi, Ilahatan	29.08.1989	JN083486	JN083550	JN083604	JN083657	JN083729
Pterocarpus macrocarpus Kurz (=Pterocarpus cambodianus (Pierre) Gagn.)	Monyrak, Meng 223 (K)	Cambodia, Prov. Stung Treng, Distr., Thala Barevath, Kalay Island Ramsar site	-	JN083487	JN083551	JN083605	JN083658	JN083730
Pterocarpus marsupium Roxb.	Klackenberg, J. & Lundin, R. 253 (K)	India, Tamil Nadu, Nilgiris, Ootacamund area	05.10.1982	JN083488	-	-	JN083659	JN083731
Pterocarpus marsupium Roxb.	Saslis-Lagoudakis, C.H.	cult, Botanical gardens of Forest Research Institute of India , Dehra Dun	-	JN083489	JN083552	JN083606	JN083660	JN083732
Pterocarpus marsupium Roxb.	Saslis-Lagoudakis, C.H.	cult, Botanical gardens of Forest Research Institute of India , Dehra Dun	-	JN083490	JN083553	JN083607	JN083661	JN083733
Pterocarpus michelianus N. Zamora	V. Ramirez et al. 263 (MO)	Costa Rica, San Jose	23.02.1994	JN083491	JN083554	-	JN083662	JN083734
Pterocarpus mildbraedii Harms subsp. mildbraedii	Chapman, J.D. 3849 (K)	Nigeria, NE State, Sardauna Prov., River Nwam Forest Reserve, Mambilla Plateau	12.04.1975	JN083492	JN083555	JN083608	JN083663	JN083735
Pterocarpus mildbraedii Harms subsp. usambarensis (Verdc.) Polhill	Greenway, P.J. 7923 (K)	Tanzania, E of Usambara	26.01.1947	JN083493	-	JN083609	JN083664	JN083736
Pterocarpus monophyllus Klitgaard, L.P.Queiroz & G.P.Lewis	Rocha, P. 23 (K)	Brazil, Bahia	-	JN083494	JN083556	-	JN083665	-
Pterocarpus officinalis Jacq. subsp. gilletii (De Wild.) Rojo	Jans 810 (K)	Dem. Rep. Congo (Congo/Leopoldville), Kutu, Bokoro	26.10.1948	JN083495	-	-	-	-
Pterocarpus officinalis Jacq. subsp. officinalis	Martinez, E.M. et al. 23116 (K)	Guatemala	26.07.1988	JN083496	JN083557	JN083610	JN083666	JN083737
Pterocarpus officinalis Jacq. subsp. officinalis	Boom, B.M. 7054 (K)	Puerto Rico	10.01.1987	JN083497	JN083558	JN083611	JN083667	JN083738
Pterocarpus osun Craib	Lowe, J. 4702 (K)	Nigeria, Ibadan	05.11.1985	JN083498	-	-	JN083668	JN083739
Pterocarpus rohrii Vahl	Tenorio, P. et al. 19712 (K)	Mexico, Chiapas	23.02.1998	JN083499	JN083559	JN083612	JN083669	JN083740
Pterocarpus rohrii Vahl	Hughes, C.E. 1190 (K)	Guatemala	03.05.1988	JN083500	JN083560	JN083613	JN083670	JN083741
Pterocarpus rohrii Vahl	Mori, S.A. & Smith, N.P. 25173 (K)	French Guiana	15.09.2000	JN083501	JN083561	-	JN083671	JN083742
Pterocarpus rohrii Vahl	Klitgaard, B.B. et al. 61 (BM)	Brazil, Esprito Santo	30.12.1993	JN083502	-	JN083614	JN083672	JN083743
Pterocarpus rohrii Vahl	Irwin, H.S. 48775 (K)	Brazil, Amapa	17.10.1960	JN083503	-	-	JN083673	JN083744
Pterocarpus rohrii Vahl (=Pterocarpus floribundus (Benth.) Kuntze)	Elias, B. 1209 (K)	Colombia, Barranquilla	05.1934	JN083504	JN083562	JN083615	JN083674	JN083745
Pterocarpus rohrii Vahl (=Pterocarpus steinbachianus Harms)	Nee, M. 50163 (K)	Bolivia, Santa Cruz	16.10.1999	JN083505	JN083563	JN083616	JN083675	JN083746
Pterocarpus rohrii Vahl (=Pterocarpus violaceus Vogel)	Pirani, J.R. et al. 26889 (K)	Brazil, Espirito Santo	10.05.1993	JN083506	JN083564	JN083617	JN083676	JN083747
Pterocarpus rotundifolius (Sond.) Druce subsp. polyanthus (Harms) Mend. & Sousa	Bingham, M.G. & Jeffery, R. 11799 (K)	Zambia, S Prov., Mazabuka Distr., Kaleya Ranch	12.01.1999	JN083507	JN083565	JN083618	JN083677	JN083748
Pterocarpus rotundifolius (Sond.) Druce subsp. polyanthus var. martinii (Dunkley) Mend. & Sousa	White, F. 6492 (K)	Zambia, S Prov., Mazabuka	26.01.1960	JN083508	JN083566	JN083619	JN083678	JN083749
Pterocarpus rotundifolius (Sond.) Druce subsp. polyanthus var. martinii (Dunkley) Mend. & Sousa	Leach, L.C. et al. 14991 (K)	Zimbabwe (Rhodesia), Distr. Lomagundi	15.02.1973	JN083509	JN083567	JN083620	JN083679	JN083750
Pterocarpus rotundifolius (Sond.) Druce subsp. rotundifolius (=Pterocarpus sericeus Benth.)	Balsinhas, A. 2841 (K)	South Africa, Transvaal, Pretoria Bot. Res. Inst., Botanic Gardens, Kloof Forest Section	06.01.1976	JN083510	JN083568	JN083621	JN083680	JN083751
Pterocarpus santalinoides L'Hér. ex DC.	van Andel, T. et al. 1925 (K)	Guyana	03.10.1997	JN083511	-	-	JN083681	JN083752
Pterocarpus santalinoides L'Hér. ex DC.	Tutin, C.E.G. s.n. (K)	Senegal, Lingue Koto, Senegal Oriental	20.02.1980	JN083512	-	JN083622	JN083682	JN083753
Pterocarpus santalinoides L'Hér. ex DC.	Martin, J.K. SL871 (K)	Sierra Leone, Taiama	23.02.1964	JN083513	JN083569	JN083623	JN083683	JN083754
Pterocarpus santalinoides L'Hér. ex DC.	Lock, J.M. 84/29 (K)	Togo, banks of River Koumangou at Naboulgou, Sansanne Mango	23.03.1984	JN083514	JN083570	JN083624	JN083684	JN083755
Pterocarpus santalinoides L'Hér. ex DC.	Hatschbach, G. et al. 65625 (K)	Brazil, Mato Grosso	16.11.1996	JN083515	JN083571	JN083625	JN083685	JN083756
Pterocarpus santalinus Buch.-Ham. ex Wall.	Saslis-Lagoudakis, C.H.	cult, Botanical gardens of Forest Research Institute of India , Dehra Dun	-	JN083516	JN083572	JN083626	JN083686	JN083757
Pterocarpus santalinus Buch.-Ham. ex Wall.	Saslis-Lagoudakis, C.H.	cult, Botanical gardens of Forest Research Institute of India , Dehra Dun	-	JN083517	JN083573	JN083627	JN083687	JN083758
Pterocarpus santalinus Buch.-Ham. ex Wall.	Saslis-Lagoudakis, C.H.	bark from market	-	JN083518	JN083574	JN083628	JN083688	JN083759
Pterocarpus soyauxii Taub.	Lisowski, S. 42883 (K)	Democratic Republic of Congo, Kisangani	14.05.1976	JN083519	-	-	-	-
Pterocarpus soyauxii Taub.	McPherson, G. 16252 (K)	Gabon, Ogooe-Ivindo, Booue	23.11.1993	JN083520	-	-	-	JN083760
Pterocarpus ternatus Rizzini	Harley, R.M. et al. 26138 (K)	Brazil, Bahia	12.12.1988	JN083521	JN083575	JN083629	JN083689	JN083761
Pterocarpus tinctorius Welw.	Schmitz 5970 (K)	Dem. Rep. Congo (Congo), Katanga, Terr. Jadotville	04.1958	JN083522	JN083576	JN083630	JN083690	JN083762
Pterocarpus tinctorius Welw.	Reekmans, M. 9232 (K)	Burundi	01.05.1980	JN083523	JN083577	JN083631	JN083691	JN083763
Pterocarpus tinctorius Welw. (=Pterocarpus albopubescens Hauman)	Delvaux, J. 650 (K)	Democratic Republic of Congo, Katanga	15.06.1957	JN083524	JN083578	JN083632	JN083692	JN083764
Pterocarpus tinctorius Welw. (=Pterocarpus chrysothrix Taub.)	Mwasumbi, L. & Clarke, P. 3608 (K)	Tanzania, Lindi Distr., between lake Lutamba and lake Tandangogoro	23.07.1993	JN083525	JN083579	JN083633	JN083693	JN083765
Pterocarpus tinctorius Welw. (=Pterocarpus chrysothrix Taub.)	Wageman 1769 (K)	Dem. Rep. Congo (Congo/Leopoldville), Boma, INEAC-Luki	25.09.1957	JN083526	JN083580	JN083634	JN083694	JN083766
Pterocarpus tinctorius Welw. (=Pterocarpus chrysothrix Taub.)	Lovett, J. & Congden, C. 1955 (K)	Tanzania, Iringa Region, Mufindi Distr.	05.03.1987	JN083527	-	-	JN083695	-
Pterocarpus tinctorius Welw. (=Pterocarpus holtzii Harms)	Rees, A.F. T151 (K)	Tanzania, T8, Yerende Ferry Selous Game Reserve	21.07.1971	JN083528	JN083581	-	JN083696	JN083767
Pterocarpus tinctorius Welw. (=Pterocarpus odoratus De Wild.)	Procter 1142 (K)	Tanzania, Biharamulo	01.02.1959	JN083529	-	JN083635	JN083697	JN083768
Pterocarpus villosus (Mart. ex Benth.) Benth.	Alencar, M.E. 237 (K)	Brazil, Piaui	20.05.1995	JN083530	JN083582	JN083636	JN083698	JN083769
Pterocarpus zehntneri Harms	Ribon, R. 23137 (K)	Brazil, Espirito Santo	29.12.1999	JN083531	JN083583	JN083637	JN083699	JN083770
